# Supplementary material for: Transplanted human intestinal organoids: a resource for modeling human intestinal development
Source: Oxford University Press journal article supplement (doi:10.1242/dev.201416), 2023-04-18
Supplement: dev201416supp.pdf [file dev201416supp.pdf]

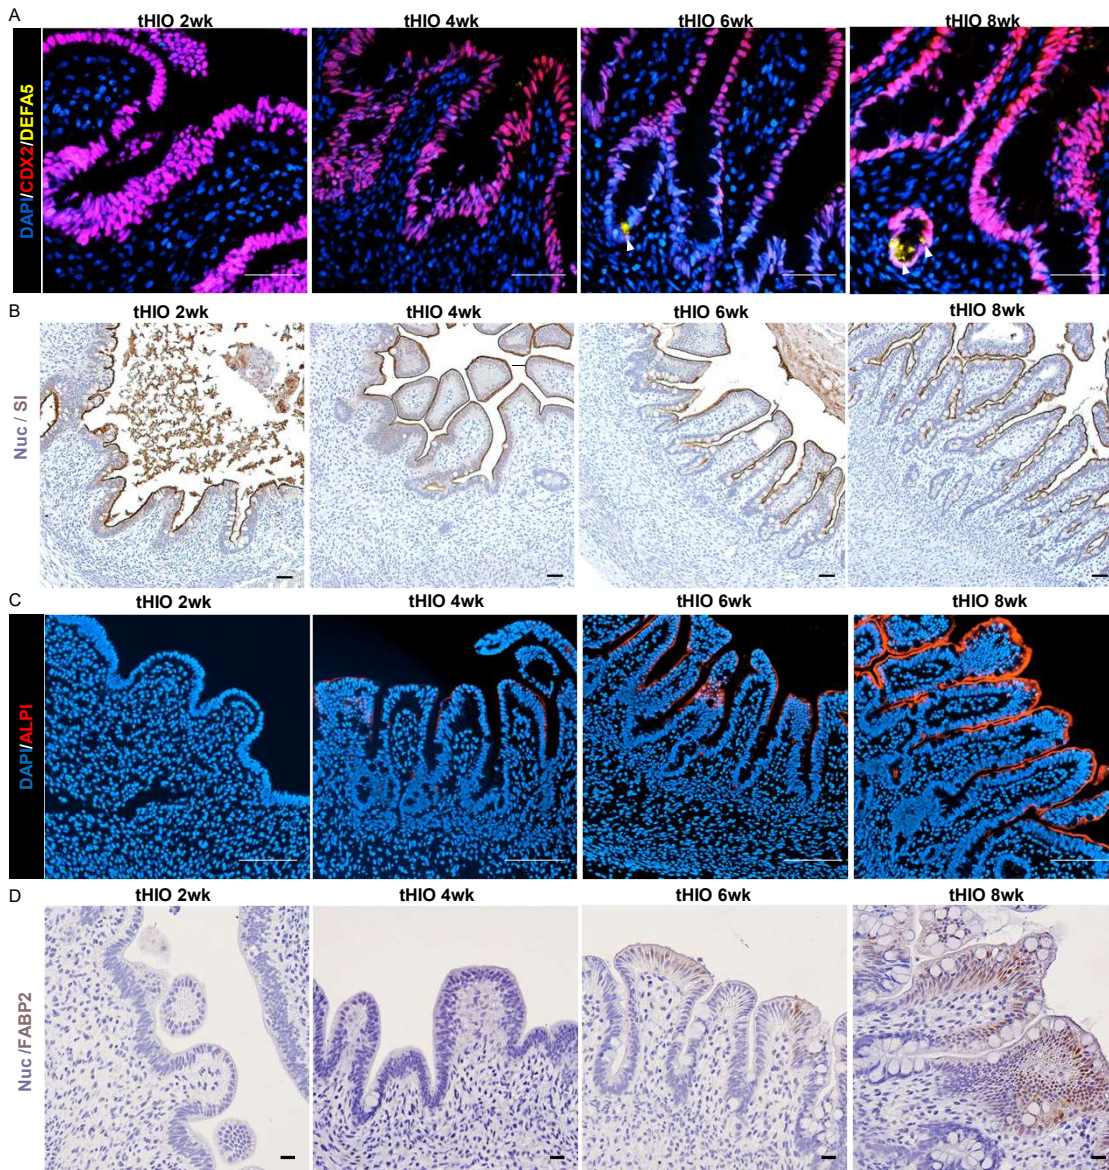

**Fig. S1. The tHIO system can be used to study cellular maturation over time** (n=5 per timepoint). (A) Staining for DEFA5 (yellow), a marker of Paneth cells (white arrowhead), and CDX2 (red), a marker of intestinal epithelium, across the tHIO timecourse. (B) Staining for SI (brown), a brush border enzyme that marks enterocytes. (C) Staining for ALPI (red), a marker of enterocyte function, across the tHIO timecourse. (D) Staining for FABP2 (brown), a fatty acid transporter, over time.

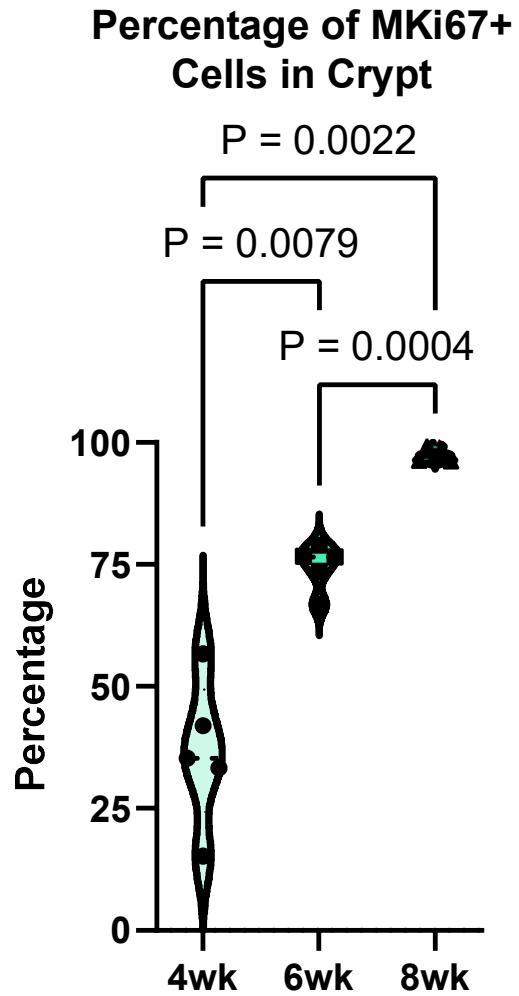

**Fig. S2. Over time, crypt cells MKi67+ cells become restricted to the intestinal crypts in tHIOs.** (n=5 per timepoint). P-values were assigned using a Brown-Forsythe and Welch ANOVA one-tailed test. A Dunnett T3 test was performed to correct for multiple comparisons.

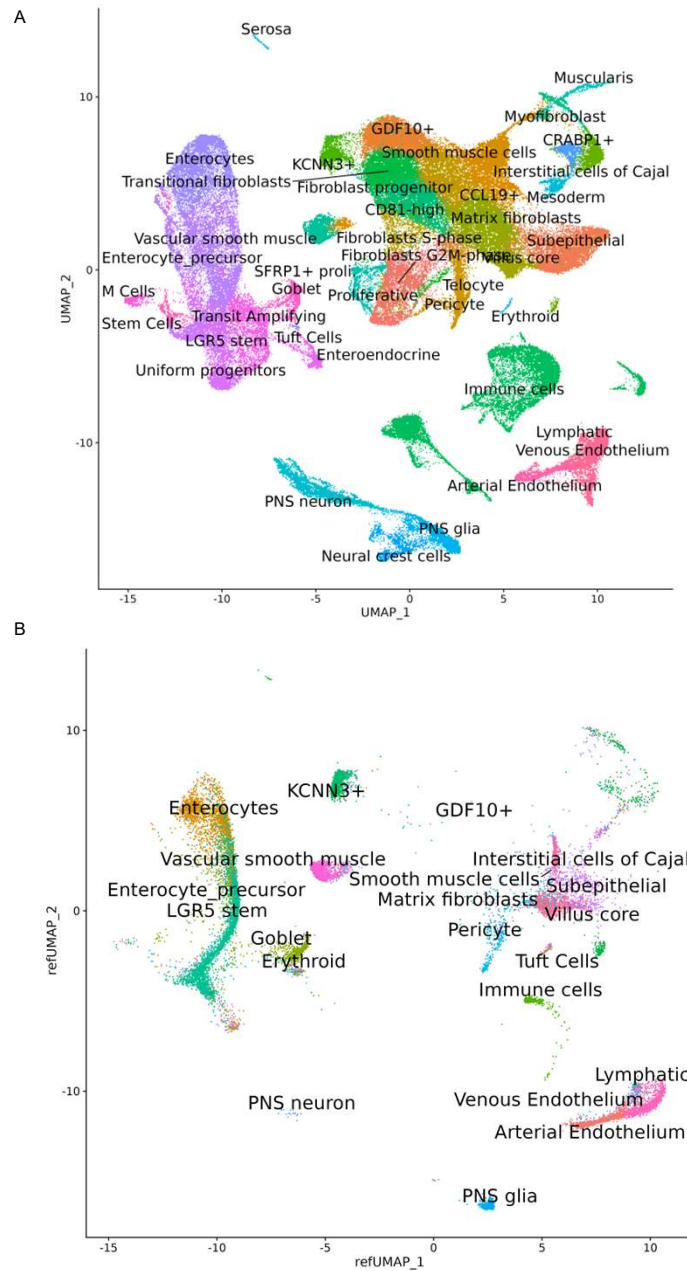

**Fig. S3. Single cell analysis of patient human intestine.** (A) UMAP of Reference Atlas constructed from three publicly available single cell RNA sequencing datasets. Reference Atlas was used to label tHIO samples and patient human intestine sample. (B) Single nucleus RNA sequencing dataset generated from a full-thickness patient sample (n=1). Single nucleus extraction protocol successfully isolated nuclei from a diverse range of cell types, including epithelial and mesenchymal cells.

**A**

**Upregulated Early Biological Processes: LGR5+ Cells in the Reference Atlas**

| GO Type                | Number     | Process                                     |
|------------------------|------------|---------------------------------------------|
| GO: Biological Process | GO:0006412 | translation                                 |
| GO: Biological Process | GO:0043043 | peptide biosynthetic process                |
| GO: Biological Process | GO:0006518 | peptide metabolic process                   |
| GO: Biological Process | GO:0002181 | cytoplasmic translation                     |
| GO: Biological Process | GO:0043604 | amide biosynthetic process                  |
| GO: Biological Process | GO:0043603 | cellular amide metabolic process            |
| GO: Biological Process | GO:0034645 | cellular macromolecule biosynthetic process |
| GO: Biological Process | GO:0032543 | mitochondrial translation                   |
| GO: Biological Process | GO:0140053 | mitochondrial gene expression               |
| GO: Biological Process | GO:0042254 | ribosome biogenesis                         |

**Upregulated Late Biological Processes: LGR5+ Cells in the Reference Atlas**

| GO Type                | Number     | Process                                     |
|------------------------|------------|---------------------------------------------|
| GO: Biological Process | GO:0006412 | translation                                 |
| GO: Biological Process | GO:0043043 | peptide biosynthetic process                |
| GO: Biological Process | GO:0043604 | amide biosynthetic process                  |
| GO: Biological Process | GO:0006518 | peptide metabolic process                   |
| GO: Biological Process | GO:0002181 | cytoplasmic translation                     |
| GO: Biological Process | GO:0043603 | cellular amide metabolic process            |
| GO: Biological Process | GO:0032543 | mitochondrial translation                   |
| GO: Biological Process | GO:0034645 | cellular macromolecule biosynthetic process |
| GO: Biological Process | GO:0140053 | mitochondrial gene expression               |
| GO: Biological Process | GO:0022613 | ribonucleoprotein complex biogenesis        |

**B**

**Upregulated Early Biological Processes: LGR5+ Cells in the tHIOs**

| GO Type                | Number     | Process                                               |
|------------------------|------------|-------------------------------------------------------|
| GO: Biological Process | GO:0048666 | neuron development                                    |
| GO: Biological Process | GO:0031175 | neuron projection development                         |
| GO: Biological Process | GO:0034330 | cell junction organization                            |
| GO: Biological Process | GO:0000902 | cell morphogenesis                                    |
| GO: Biological Process | GO:0050808 | synapse organization                                  |
| GO: Biological Process | GO:0000904 | cell morphogenesis involved in differentiation        |
| GO: Biological Process | GO:0072359 | circulatory system development                        |
| GO: Biological Process | GO:0120039 | plasma membrane bounded cell projection morphogenesis |
| GO: Biological Process | GO:006429  | epithelium development                                |
| GO: Biological Process | GO:0048858 | cell projection morphogenesis                         |

**Upregulated Late Biological Processes: LGR5+ Cells in the tHIOs**

| GO Type                | Number     | Process                                          |
|------------------------|------------|--------------------------------------------------|
| GO: Biological Process | GO:0000902 | cell morphogenesis                               |
| GO: Biological Process | GO:0007010 | cytoskeleton organization                        |
| GO: Biological Process | GO:0032880 | regulation of protein localization               |
| GO: Biological Process | GO:0060341 | regulation of cellular localization              |
| GO: Biological Process | GO:0030029 | actin filament-based process                     |
| GO: Biological Process | GO:0046907 | intracellular transport                          |
| GO: Biological Process | GO:0033043 | regulation of organelle organization             |
| GO: Biological Process | GO:0044265 | cellular macromolecule catabolic process         |
| GO: Biological Process | GO:0022603 | regulation of anatomical structure morphogenesis |
| GO: Biological Process | GO:0048858 | cell projection morphogenesis                    |

**C**

**Upregulated Early Biological Processes: Telocytes**

| GO Type                | Number     | Process                        |
|------------------------|------------|--------------------------------|
| GO: Biological Process | GO:0061061 | muscle structure development   |
| GO: Biological Process | GO:0072359 | circulatory system development |
| GO: Biological Process | GO:0007155 | cell adhesion                  |
| GO: Biological Process | GO:0009887 | animal organ morphogenesis     |
| GO: Biological Process | GO:0009611 | response to wounding           |
| GO: Biological Process | GO:0035295 | tube development               |
| GO: Biological Process | GO:0009725 | response to hormone            |
| GO: Biological Process | GO:0060429 | epithelium development         |
| GO: Biological Process | GO:0048598 | embryonic morphogenesis        |
| GO: Biological Process | GO:0035239 | tube morphogenesis             |

**Upregulated Late Biological Processes: Telocytes**

| GO Type                | Number     | Process                                                  |
|------------------------|------------|----------------------------------------------------------|
| GO: Biological Process | GO:0007155 | cell adhesion                                            |
| GO: Biological Process | GO:0040011 | locomotion                                               |
| GO: Biological Process | GO:0048646 | anatomical structure formation involved in morphogenesis |
| GO: Biological Process | GO:0009887 | animal organ morphogenesis                               |
| GO: Biological Process | GO:0072359 | circulatory system development                           |
| GO: Biological Process | GO:0040012 | regulation of locomotion                                 |
| GO: Biological Process | GO:0035295 | tube development                                         |
| GO: Biological Process | GO:0043067 | regulation of programmed cell death                      |
| GO: Biological Process | GO:0001944 | vasculature development                                  |
| GO: Biological Process | GO:0060429 | epithelium development                                   |

**D**

**Upregulated Early Biological Processes: Telocytes**

| GO Type                | Number     | Process                        |
|------------------------|------------|--------------------------------|
| GO: Biological Process | GO:0031175 | neuron projection development  |
| GO: Biological Process | GO:0048666 | neuron development             |
| GO: Biological Process | GO:0000902 | cell morphogenesis             |
| GO: Biological Process | GO:0030334 | regulation of cell migration   |
| GO: Biological Process | GO:0061061 | muscle structure development   |
| GO: Biological Process | GO:0072359 | circulatory system development |
| GO: Biological Process | GO:0048729 | tissue morphogenesis           |
| GO: Biological Process | GO:0060485 | mesenchyme development         |
| GO: Biological Process | GO:0035239 | tube morphogenesis             |
| GO: Biological Process | GO:0060429 | epithelium development         |

**Upregulated Late Biological Processes: Telocytes**

| GO Type                | Number     | Process                                        |
|------------------------|------------|------------------------------------------------|
| GO: Biological Process | GO:0048666 | neuron development                             |
| GO: Biological Process | GO:0000902 | cell morphogenesis                             |
| GO: Biological Process | GO:0048589 | developmental growth                           |
| GO: Biological Process | GO:0072359 | circulatory system development                 |
| GO: Biological Process | GO:0002064 | epithelial cell development                    |
| GO: Biological Process | GO:0035295 | tube development                               |
| GO: Biological Process | GO:0019827 | stem cell population maintenance               |
| GO: Biological Process | GO:0000904 | cell morphogenesis involved in differentiation |
| GO: Biological Process | GO:0007507 | heart development                              |
| GO: Biological Process | GO:0008593 | regulation of Notch signaling pathway          |

**Fig. S4. LGR5+ stem cells and telocytes remain transcriptionally stable over time.** (A) Upregulated early (left) and late (right) biological processes of the Reference Atlas. (B) Upregulated early (left) and late (right) biological processes of the tHIO timecourse. (C) Upregulated early (left) and late (right) biological processes of the Reference Atlas. (D) Upregulated early (left) and late (right) biological processes of the tHIO timecourse.

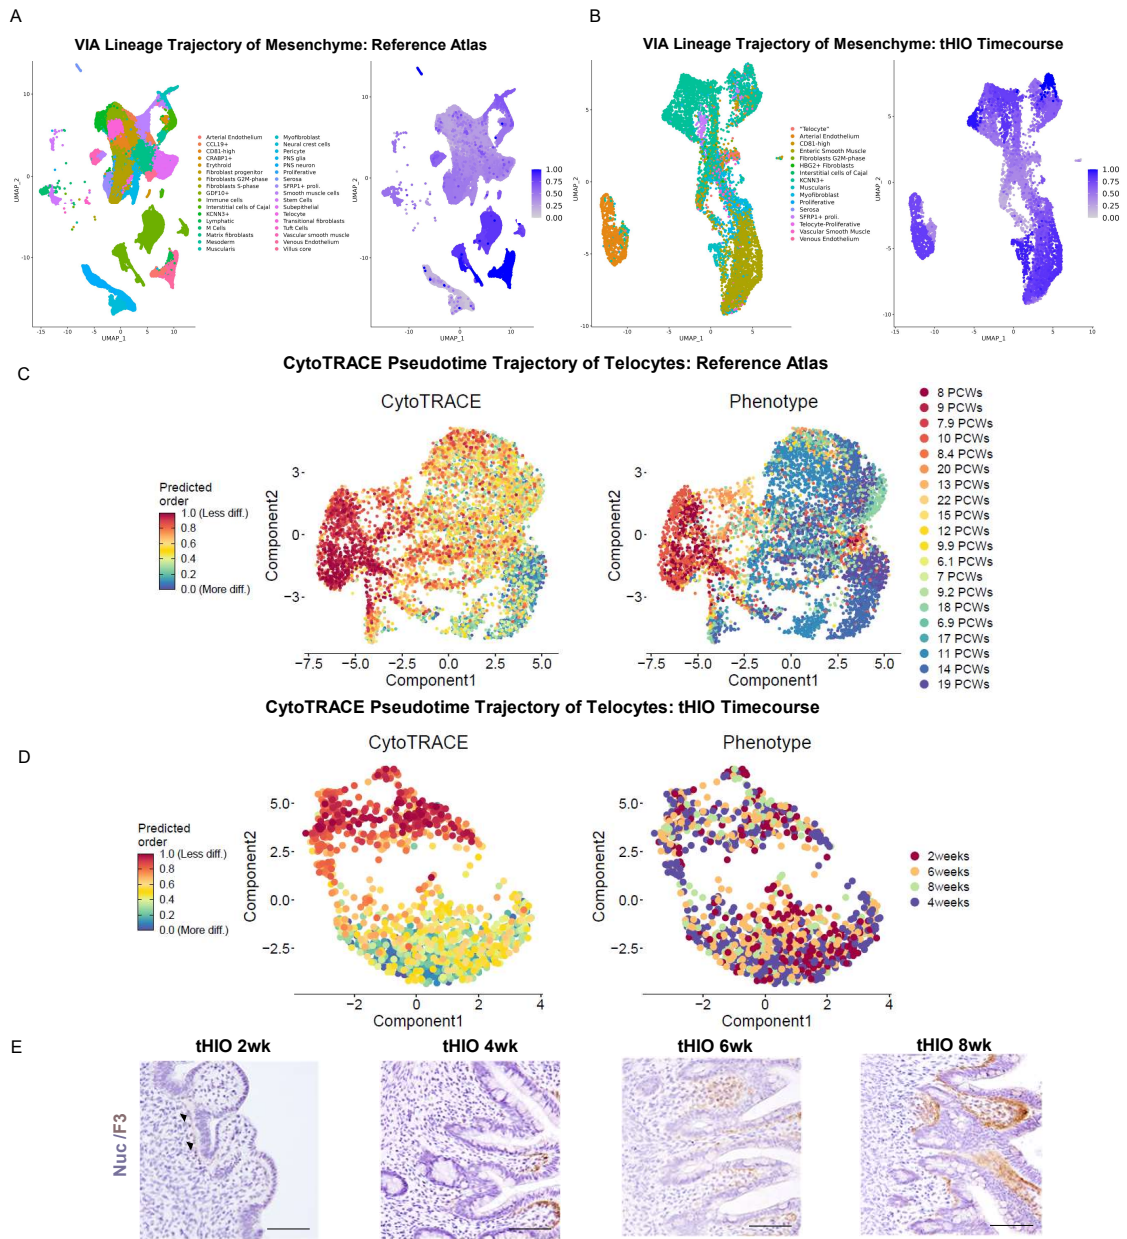

**Fig. S5. Mesenchymal development in tHIOs mimics fetal human intestinal mesenchymal development** (A) UMAP and VIA Pseudotime Trajectory of mesenchymal cell development in the Reference Atlas (B) UMAP and VIA Pseudotime Trajectory of mesenchymal cell development in the tHIO timecourse (C) CytoTRACE Pseudotime Trajectory of telocytes in the Reference Atlas (D) CytoTRACE Pseudotime Trajectory of telocytes in the tHIO timecourse. (E) Staining for F3 (brown), a marker of subepithelial cells, over time.

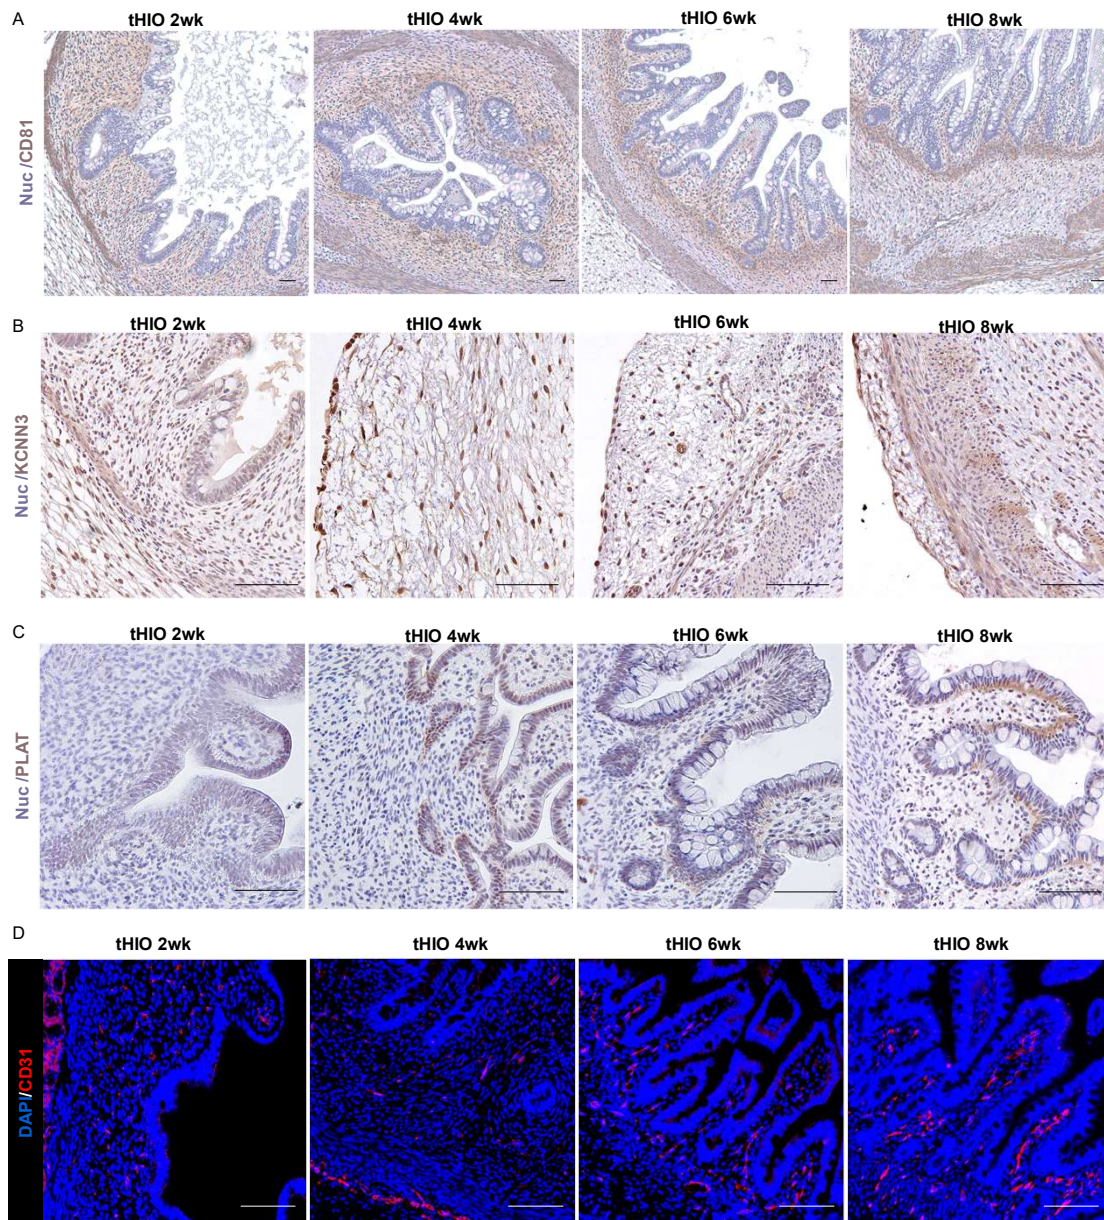

**Fig. S6.** The tHIO system can be used to study the maturation of the mesenchyme over time. (n=5 per timepoint) (A) Staining for CD81 (brown), a marker of CD81 high cells, across the tHIO timecourse. (B) Staining for KCCN3 (brown), a marker of KCNN3+ fibroblasts, across the tHIO timecourse. (C) Staining for PLAT (brown), a marker of myofibroblasts, across the tHIO timecourse. (D) Staining for CD31 (red), a marker of endothelial cells, over time.

**A**

| Upregulated Biological Processes in Subepithelial Cells |            |                                              | Downregulated Biological Processes in Subepithelial Cells |            |                                     |
|---------------------------------------------------------|------------|----------------------------------------------|-----------------------------------------------------------|------------|-------------------------------------|
| GO TYPE                                                 | Number     | Process                                      | GO TYPE                                                   | Number     | Process                             |
| GO: Biological Process                                  | GO:0042127 | regulation of cell population proliferation  | GO: Biological Process                                    | GO:0048285 | organelle fission                   |
| GO: Biological Process                                  | GO:0051093 | negative regulation of developmental process | GO: Biological Process                                    | GO:0000280 | nuclear division                    |
| GO: Biological Process                                  | GO:0045595 | regulation of cell differentiation           | GO: Biological Process                                    | GO:0000278 | mitotic cell cycle                  |
| GO: Biological Process                                  | GO:0035295 | tube development                             | GO: Biological Process                                    | GO:0140014 | mitotic nuclear division            |
| GO: Biological Process                                  | GO:0045596 | negative regulation of cell differentiation  | GO: Biological Process                                    | GO:1903047 | mitotic cell cycle process          |
| GO: Biological Process                                  | GO:0035239 | tube morphogenesis                           | GO: Biological Process                                    | GO:0051301 | cell division                       |
| GO: Biological Process                                  | GO:0030334 | regulation of cell migration                 | GO: Biological Process                                    | GO:0022402 | cell cycle process                  |
| GO: Biological Process                                  | GO:0048585 | negative regulation of response to stimulus  | GO: Biological Process                                    | GO:0051726 | regulation of cell cycle            |
| GO: Biological Process                                  | GO:2000145 | regulation of cell motility                  | GO: Biological Process                                    | GO:0044772 | mitotic cell cycle phase transition |
| GO: Biological Process                                  | GO:0040012 | regulation of locomotion                     | GO: Biological Process                                    | GO:0044770 | cell cycle phase transition         |

**B**

| Upregulated Biological Processes in Myofibroblasts |            |                                                      | Downregulated Biological Processes in Myofibroblasts |            |                                                         |
|----------------------------------------------------|------------|------------------------------------------------------|------------------------------------------------------|------------|---------------------------------------------------------|
| GO TYPE                                            | Number     | Process                                              | GO TYPE                                              | Number     | Process                                                 |
| GO: Biological Process                             | GO:0007167 | enzyme linked receptor protein signaling pathway     | GO: Biological Process                               | GO:0001501 | skeletal system development                             |
| GO: Biological Process                             | GO:0006613 | cotranslational protein targeting to membrane        | GO: Biological Process                               | GO:0030198 | extracellular matrix organization                       |
| GO: Biological Process                             | GO:0050673 | epithelial cell proliferation                        | GO: Biological Process                               | GO:0043062 | extracellular structure organization                    |
| GO: Biological Process                             | GO:0045596 | negative regulation of cell differentiation          | GO: Biological Process                               | GO:0045229 | external encapsulating structure organization           |
| GO: Biological Process                             | GO:0045688 | negative regulation of osteoblast differentiation    | GO: Biological Process                               | GO:0051241 | negative regulation of multicellular organismal process |
| GO: Biological Process                             | GO:0009887 | animal organ morphogenesis                           | GO: Biological Process                               | GO:0060425 | lung morphogenesis                                      |
| GO: Biological Process                             | GO:0030278 | regulation of ossification                           | GO: Biological Process                               | GO:0050650 | chondroitin sulfate proteoglycan biosynthetic process   |
| GO: Biological Process                             | GO:0031099 | regeneration                                         | GO: Biological Process                               | GO:0061138 | morphogenesis of a branching epithelium                 |
| GO: Biological Process                             | GO:0050679 | positive regulation of epithelial cell proliferation | GO: Biological Process                               | GO:0001763 | morphogenesis of a branching structure                  |
| GO: Biological Process                             | GO:0001568 | blood vessel development                             | GO: Biological Process                               | GO:0002009 | morphogenesis of an epithelium                          |

**C**

| Upregulated Biological Processes in CD81 High Cells |            |                                                | Downregulated Biological Processes in CD81 High Cells |            |                                      |
|-----------------------------------------------------|------------|------------------------------------------------|-------------------------------------------------------|------------|--------------------------------------|
| GO TYPE                                             | Number     | Process                                        | GO TYPE                                               | Number     | Process                              |
| GO: Biological Process                              | GO:0043062 | extracellular structure organization           | GO: Biological Process                                | GO:0051301 | cell division                        |
| GO: Biological Process                              | GO:0045229 | external encapsulating structure organization  | GO: Biological Process                                | GO:0000280 | nuclear division                     |
| GO: Biological Process                              | GO:0030199 | collagen fibril organization                   | GO: Biological Process                                | GO:0051726 | regulation of cell cycle             |
| GO: Biological Process                              | GO:0001501 | skeletal system development                    | GO: Biological Process                                | GO:0048285 | organelle fission                    |
| GO: Biological Process                              | GO:0001503 | ossification                                   | GO: Biological Process                                | GO:0022402 | cell cycle process                   |
| GO: Biological Process                              | GO:0009887 | animal organ morphogenesis                     | GO: Biological Process                                | GO:0000278 | mitotic cell cycle                   |
| GO: Biological Process                              | GO:0048286 | lung alveolus development                      | GO: Biological Process                                | GO:0140014 | mitotic nuclear division             |
| GO: Biological Process                              | GO:0009719 | response to endogenous stimulus                | GO: Biological Process                                | GO:1903047 | mitotic cell cycle process           |
| GO: Biological Process                              | GO:2000647 | negative regulation of stem cell proliferation | GO: Biological Process                                | GO:0000819 | sister chromatid segregation         |
| GO: Biological Process                              | GO:0071230 | cellular response to amino acid stimulus       | GO: Biological Process                                | GO:0000070 | mitotic sister chromatid segregation |
| GO: Biological Process                              | GO:0045595 | regulation of cell differentiation             |                                                       |            |                                      |

**D**

| Upregulated Biological Processes in KCNN3+ Fibroblasts |            |                                               | Downregulated Biological Processes in KCNN3+ Fibroblasts |            |                                             |
|--------------------------------------------------------|------------|-----------------------------------------------|----------------------------------------------------------|------------|---------------------------------------------|
| GO TYPE                                                | Number     | Process                                       | GO TYPE                                                  | Number     | Process                                     |
| GO: Biological Process                                 | GO:0030198 | extracellular matrix organization             | GO: Biological Process                                   | GO:0051301 | cell division                               |
| GO: Biological Process                                 | GO:0043062 | extracellular structure organization          | GO: Biological Process                                   | GO:0060485 | mesenchyme development                      |
| GO: Biological Process                                 | GO:0045229 | external encapsulating structure organization | GO: Biological Process                                   | GO:0016477 | cell migration                              |
| GO: Biological Process                                 | GO:0070848 | response to growth factor                     | GO: Biological Process                                   | GO:0009790 | embryo development                          |
| GO: Biological Process                                 | GO:0009887 | animal organ morphogenesis                    | GO: Biological Process                                   | GO:0050673 | epithelial cell proliferation               |
| GO: Biological Process                                 | GO:0042340 | keratan sulfate catabolic process             | GO: Biological Process                                   | GO:0048568 | embryonic organ development                 |
| GO: Biological Process                                 | GO:0007155 | cell adhesion                                 | GO: Biological Process                                   | GO:0045595 | regulation of cell differentiation          |
| GO: Biological Process                                 | GO:0022610 | biological adhesion                           | GO: Biological Process                                   | GO:0045596 | negative regulation of cell differentiation |
| GO: Biological Process                                 | GO:0006936 | muscle contraction                            | GO: Biological Process                                   | GO:0048762 | mesenchymal cell differentiation            |
| GO: Biological Process                                 | GO:0044273 | sulfur compound catabolic process             | GO: Biological Process                                   | GO:0030334 | regulation of cell migration                |

**Fig. S7. Functions of select mesenchymal cell types.** (A) Upregulated (left) and downregulated (right) GO terms for subepithelial cells. (B) Upregulated (left) and downregulated (right) GO terms for myofibroblasts. (C) Upregulated (left) and downregulated (right) GO terms for CD81 high cells. (D) Upregulated (left) and downregulated (right) GO terms for KCNN3+ fibroblasts.

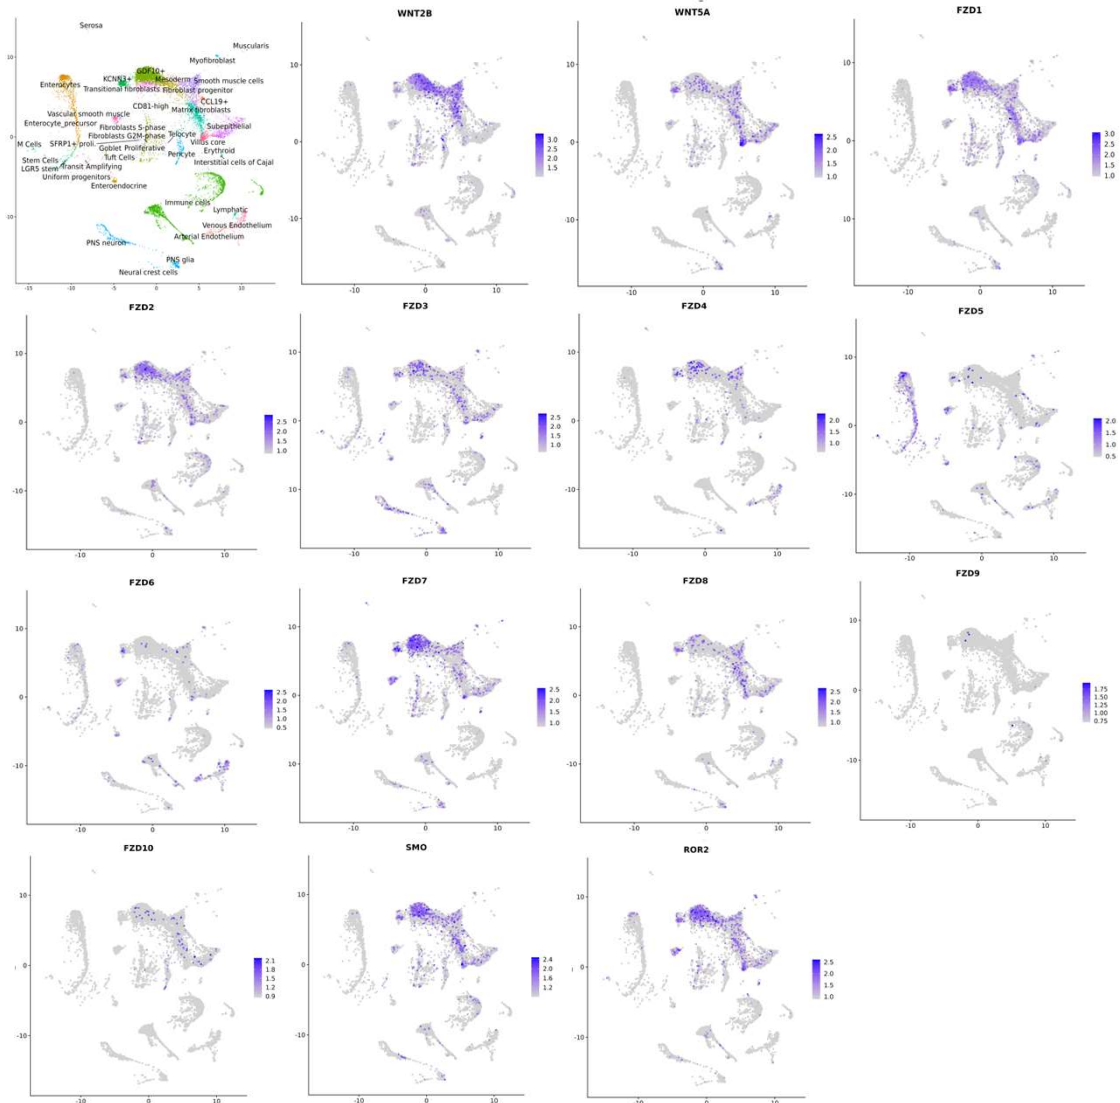

**Fig. S8. Receptor-Ligand analysis of key niche factors Wnt2b and Wnt5a in GW18 human intestine.**



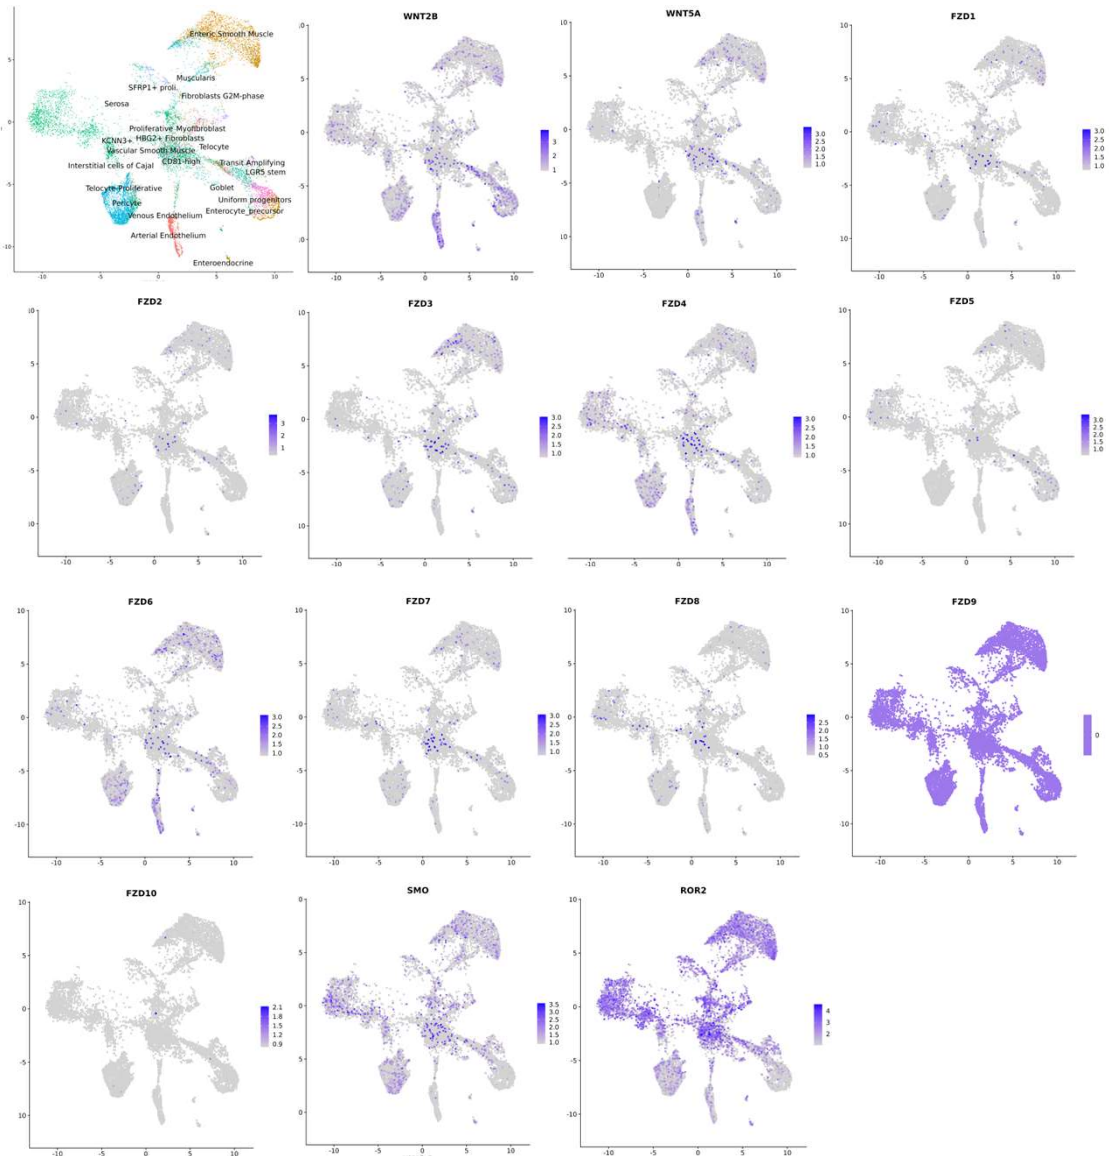

**Fig. S9. Receptor-Ligand analysis of key niche factors Wnt2b and Wnt5a in 8wk tHIO.**

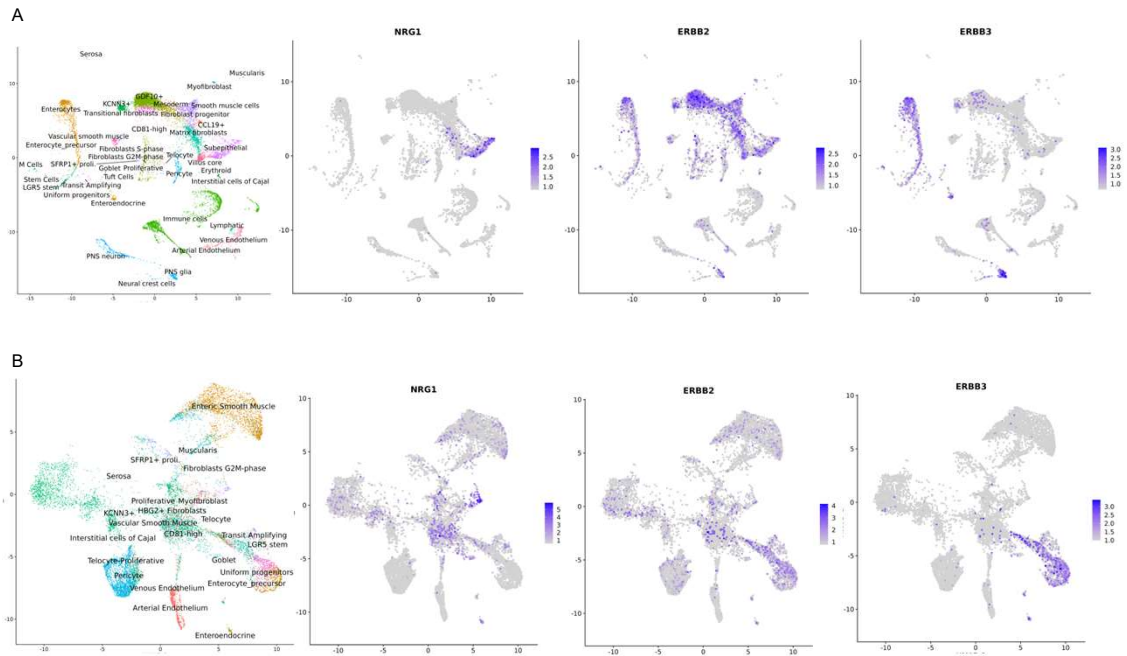

**Fig. S10.** Receptor-Ligand analysis of key niche factor NRG1 in GW 18 human intestine (A) and 8wk thIO (B).

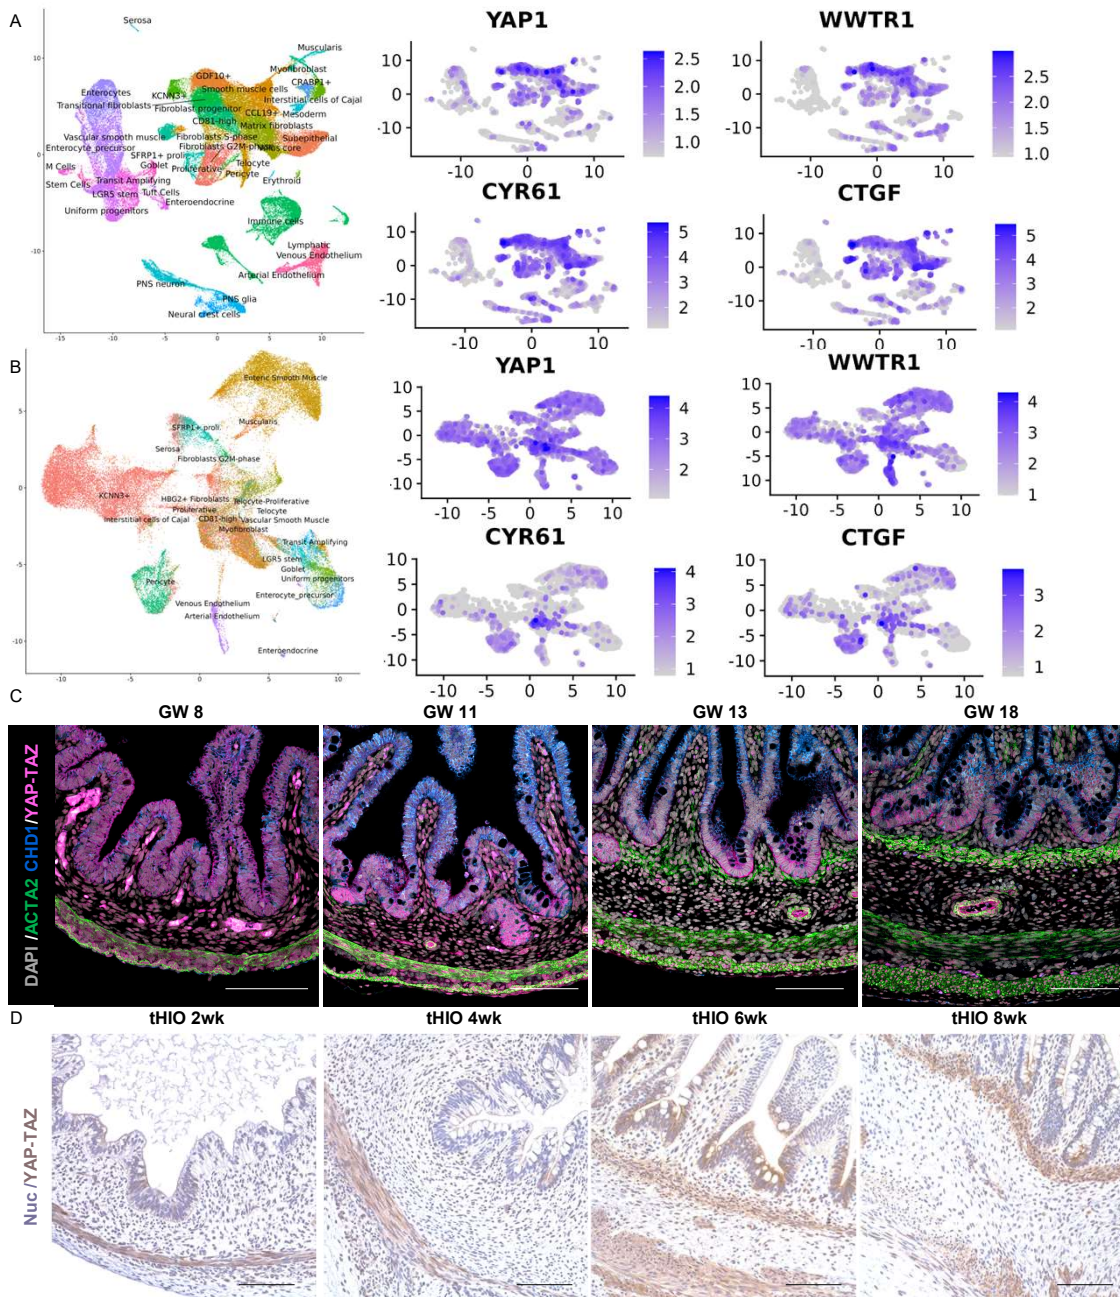

**Fig. S11. The HIPPO/YAP pathway plays a role in regulating enteric smooth muscle development.** (A) Feature plots showing transcription of YAP1, WWTR1, and YAP target genes CYR61 and CTGF in the mesenchyme of GW18 human fetal intestine. (B) Feature plots showing transcription of YAP1, WWTR1, and YAP target genes CYR61 and CTGF in the mesenchyme of 8wk tHIO. (C) Staining for ACTA2 (green), CDH1 (blue) and the YAP-TAZ complex (pink) at key timepoints in fetal human intestine (n=1 per timepoint). (D) Staining for the YAP-TAZ complex (brown) across the tHIO timecourse (n=5 per timepoint).

**Table S1. Antibody Information for Immunohistochemistry and Immunofluorescence Staining.**

|                         | Antigen                                                          | Dilution               | Host      | Company: Catalog Number   |                           |
|-------------------------|------------------------------------------------------------------|------------------------|-----------|---------------------------|---------------------------|
| Primary                 | Anillin (ANLN)                                                   | 1:10<br>0              | Rabbit    | Atlas: HPA050556          |                           |
|                         | Platelet Endothelial Cell Adhesion Molecule (CD31)               | 1:10<br>0              | Rabbit    | Abcam: ab28364            |                           |
|                         | Tetraspanin-28 (CD81)                                            | 1:25<br>0              | Rabbit    | Atlas: HPA007234          |                           |
|                         | Chromogranin A (CHGA)                                            | 1:50<br>0              | Mouse     | DSHB: CPTC-CHGA-1         |                           |
|                         | Defensin Alpha 5 (DEFA5)                                         | 1:50<br>0              | Mouse     | Abcam: ab90802            |                           |
|                         | E-Cadherin (CDH1)                                                | 1:30<br>0              | Mouse     | BD: 610182                |                           |
|                         | Elastin Microfibril Interfacer 1 (EMILIN1)                       | 1:40<br>0              | Rabbit    | Atlas: HPA002822          |                           |
|                         | Fatty Acid Binding Protein 2 (FABP2)                             | 1:60<br>0              | Rabbit    | Atlas: HPA034607          |                           |
|                         | Coagulation Factor III (F3)                                      | 1:25<br>0              | Rabbit    | Atlas: HPA049292          |                           |
|                         | Potassium Calcium-Activated Channel Subfamily N Member 3 (KCNN3) | 1:30<br>0              | Rabbit    | Atlas: HPA057127          |                           |
|                         | Leimodin 1 (LMOD1)                                               | 1:50                   | Rabbit    | Atlas: HPA030097          |                           |
|                         | Lysozyme (hLYZ)                                                  | 1:20<br>00             | Rabbit    | Biorad: 0100-0523         |                           |
|                         | Marker Of Proliferation Ki-67 (MKI67)                            | 1:35<br>0              | Rabbit    | Thermo Fisher: RM-9106-50 |                           |
|                         | Mucin-2 (MUC2)                                                   | 1:11<br>00             | Rabbit    | Abcam: ab134119           |                           |
|                         | Olfactomedin 4 (OLFM4)                                           | 1:20<br>0              | Mouse     | Cell Signalling: 14369    |                           |
|                         | Tissue Plasminogen Activator (PLAT)                              | 1:10<br>0              | Rabbit    | Atlas: HPA003412          |                           |
|                         | Sucrase-Isomaltase (SI)                                          | 1:80<br>0              | Rabbit    | Sigma: HPA011897          |                           |
|                         | Vimentin (VIM)                                                   | 1:35<br>0              | Goat      | Santa-Cruz: SC-7557       |                           |
|                         | $\alpha$ -goat AF647                                             | 1:80<br>0              | Donkey    | Life Technologies: A21447 |                           |
|                         | $\alpha$ -mouse AF568                                            | 1:<br>800              | Donkey    | Life Technologies: A10037 |                           |
|                         | Secondary                                                        | $\alpha$ -rabbit AF647 | 1:<br>800 | Donkey                    | Life Technologies: A31573 |
|                         |                                                                  | $\alpha$ -rabbit AF488 | 1:<br>800 | Donkey                    | Life Technologies: A21206 |
| $\alpha$ -rabbit Biotin |                                                                  | 1:10<br>00             | Goat      | Vector: BA-1000           |                           |
| SA Cy3                  |                                                                  | 1:50<br>0              |           | Abcam: ab175704           |                           |
